# Supplementary material
Source: PubMed Central journal article supplement (PMC8049779)
Supplement: NIHMS1688169-supplement-Supplementary_Material.pdf [file NIHMS1688169-supplement-Supplementary_Material.pdf]

## **Identifying structural determinants of product specificity in *Leishmania major* farnesyl diphosphate synthase**

Sweta Maheshwari<sup>1</sup>, Yu Seon Kim<sup>1</sup>, Srinivas Aripirala<sup>1</sup>, Michael Murphy<sup>2</sup>, L. Mario Amzel<sup>1,\*</sup>, Sandra B. Gabelli<sup>1,3,4,\*</sup>

<sup>1</sup>Department of Biophysics and Biophysical Chemistry, Johns Hopkins University School of Medicine, Baltimore, MD 21205, USA

<sup>2</sup>Cytiva, Marlborough, Massachusetts 01752

<sup>3</sup>Department of Medicine, Johns Hopkins University School of Medicine, Baltimore, Maryland 21205, USA.

<sup>4</sup>Department of Oncology, Johns Hopkins University School of Medicine, Baltimore, Maryland 21287, USA.

\*To whom correspondence should be addressed. L.M.A., E-mail: [mamzel@jhmi.edu](mailto:mamzel@jhmi.edu); S.B.G., E-mail: [gabelli@jhmi.edu](mailto:gabelli@jhmi.edu).

**Table S1. List of primers used for generating *Lm*FPPS mutants**

| Primer  | Sequence (5'-3')                        |
|---------|-----------------------------------------|
| T164F_F | GACGTCGATCTCACTACCTTTATTGGTCAGCTGTACGAC |
| T164F_R | GTCGTACAGCTGACCAATAAAGGTAGTGAGATCGACGTC |
| T164Y_F | GACGTCGATCTCACTACCTATATTGGTCAGCTGTACGAC |
| T164Y_R | GTCGTACAGCTGACCAATATAGGTAGTGAGATCGACGTC |
| T164W_F | CGTCGATCTCACTACCTGGATTGGTCAGCTGTAC      |
| T164W_R | GTACAGCTGACCAATCCAGGTAGTGAGATCGACG      |
| E97F_F  | GGCCCACTTCCTTGTGTTTGACGACATCATGGACC     |
| E97F_R  | GGTCCATGATGTCGTCAAACACAAGGAAGTGGGCC     |
| E97Y_F  | GGCCCACTTCCTTGTGTATGACGACATCATGGACC     |
| E97Y_R  | GGTCCATGATGTCGTCATACACAAGGAAGTGGGCC     |
| E97W_F  | CCCACTTCCTTGTGTGGGACGACATCATGG          |
| E97W_R  | CCATGATGTCGTCCACACAAGGAAGTGGG           |

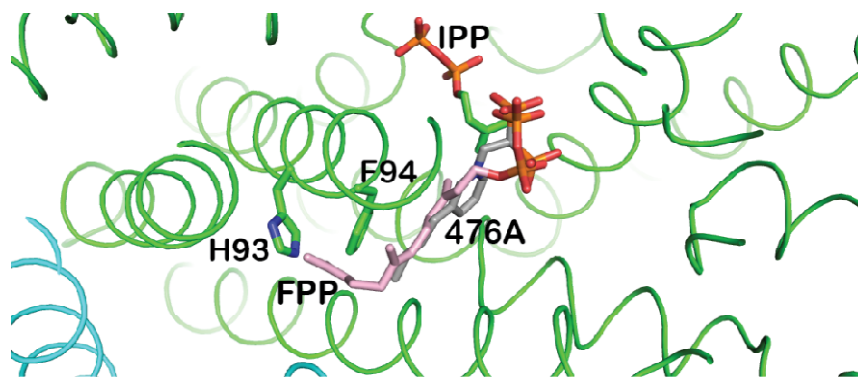

**Figure S1.** Active site of WT-*LmFPPS* (PDB ID: 4JZX) in complex with bisphosphonate inhibitor 476A (grey chain; colored by atoms), substrate IPP (colored by atoms). FPP is modeled from avian FPPS structure (PDB ID: 1UBX). The amino acid residues, H93 and F94, are shown as sticks.

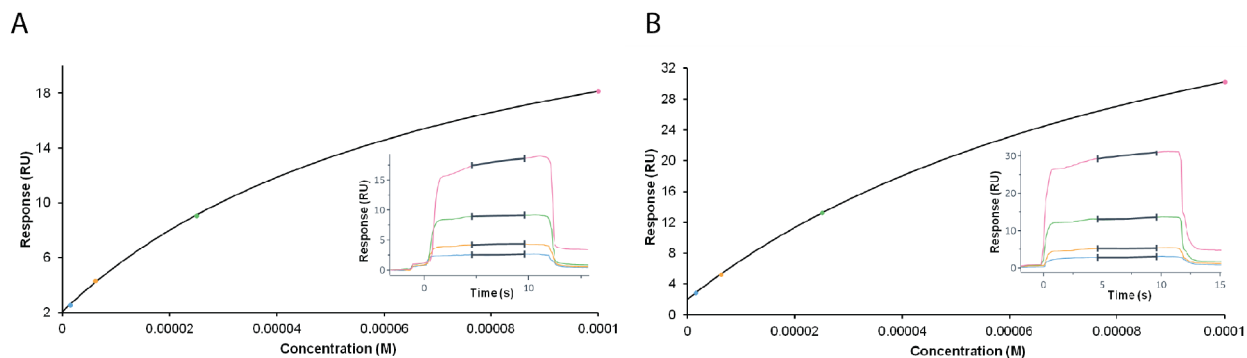

**Figure S2.** Binding of FPP to T164Y-*LmFPPS* (A) and T164W-*LmFPPS* (B) determined by SPR. Steady-state dose response curves are shown against concentration of FPP-1.5, 6.2, 25 and 100  $\mu$ M. Sensorgrams for multi-cycle kinetics are depicted as inserts.
